# Supplementary material for: Synthesis and investigation on optical and electrochemical properties of 2,4-diaryl-9-chloro-5,6,7,8-tetrahydroacridines
Source: publisher site journal article supplement (doi:10.3762/bjoc.17.162), 2021-09-20
Supplement: Additional file 1 [file 1860-5397-17-162-S1.pdf]

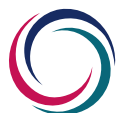

## Supporting Information

for

### **Synthesis and investigation on optical and electrochemical properties of 2,4-diaryl-9-chloro-5,6,7,8-tetrahydroacridines**

Najeh Tka, Mohamed Adnene Hadj Ayed, Mourad Ben Braiek, Mahjoub Jabli and Peter Langer

*Beilstein J. Org. Chem.* **2021**, *17*, 2450–2461. [doi:10.3762/bjoc.17.162](https://doi.org/10.3762/bjoc.17.162)

### **Synthesis and analytical data of starting compound 2 and copies of spectra for the synthesized compounds**

**1. Procedure for preparing the starting material 2,4-dibromo-9-chloro-5,6,7,8-tetrahydroacridine (2)**

3,5-Dibromoanthranilic acid (2.92 g, 10 mmol, 1 equiv) and cyclohexanone (1.07 mL, 11 mmol, 1.1 equiv) were stirred in an ice bath. Then, 15 mL of POCl<sub>3</sub> were carefully added and the mixture was heated under reflux for 4 h. The mixture was cooled to room temperature and concentrated to give a slurry. The residue was diluted with dichloromethane, neutralized with aqueous NaHCO<sub>3</sub>, and washed with brine. The organic layer was dried over anhydrous K<sub>2</sub>CO<sub>3</sub> and concentrated to afford a yellow solid. It was recrystallized from acetone to give **2** as pale yellow solid (3.24 g, 87%).

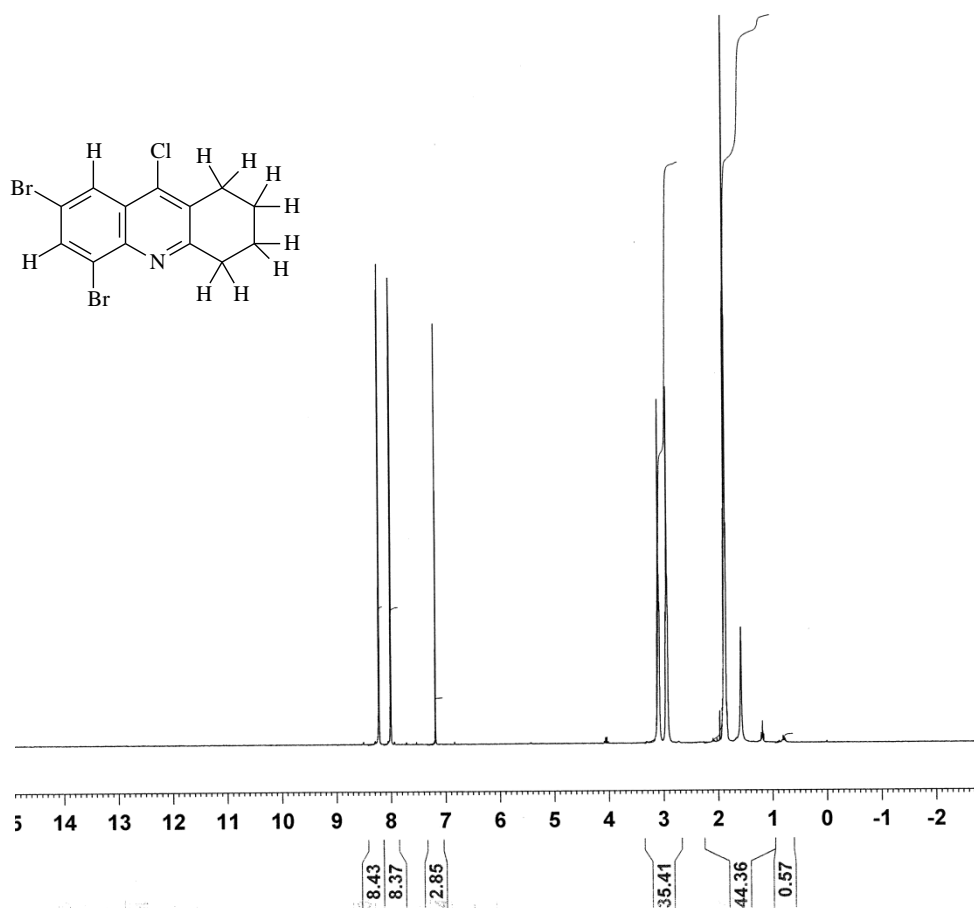

**Figure S1:** <sup>1</sup>H NMR (300 MHz, CDCl<sub>3</sub>) of 2,4-dibromo-9-chloro-5,6,7,8-tetrahydroacridine (**2**).

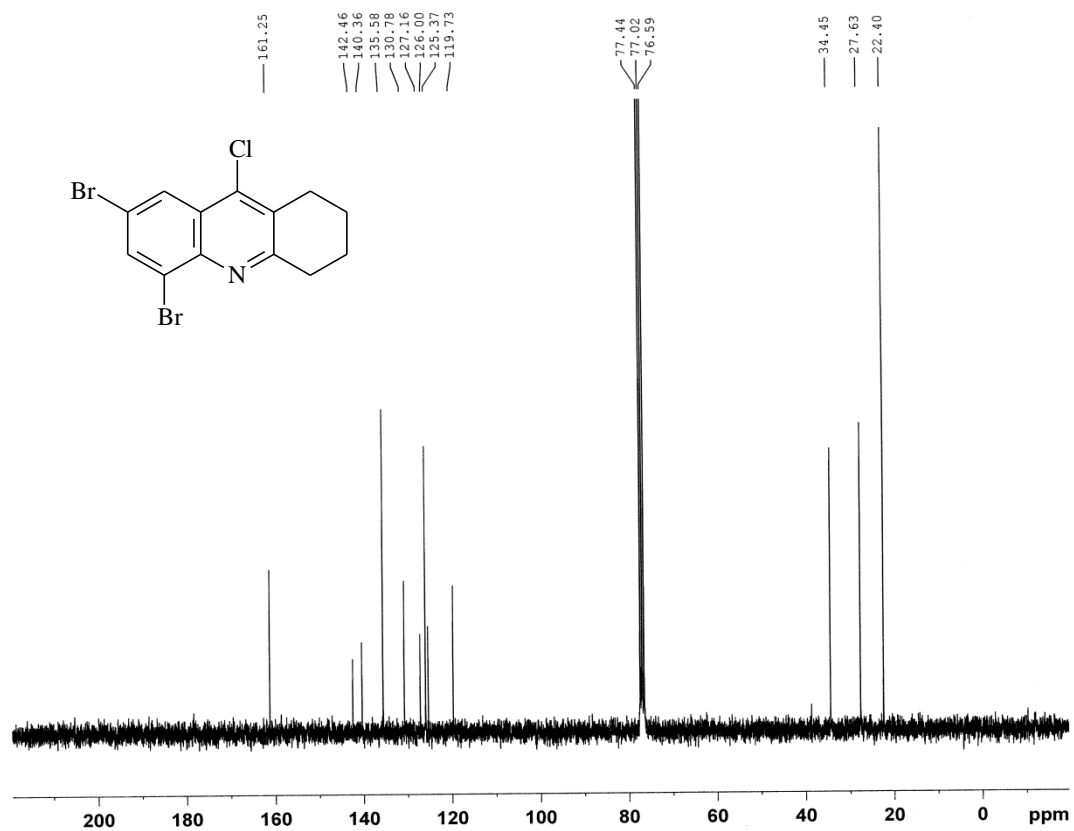

**Figure S2:**  $^{13}\text{C}$  NMR (75 MHz,  $\text{CDCl}_3$ ) of 2,4-dibromo-9-chloro-5,6,7,8-tetrahydroacridine (**2**).

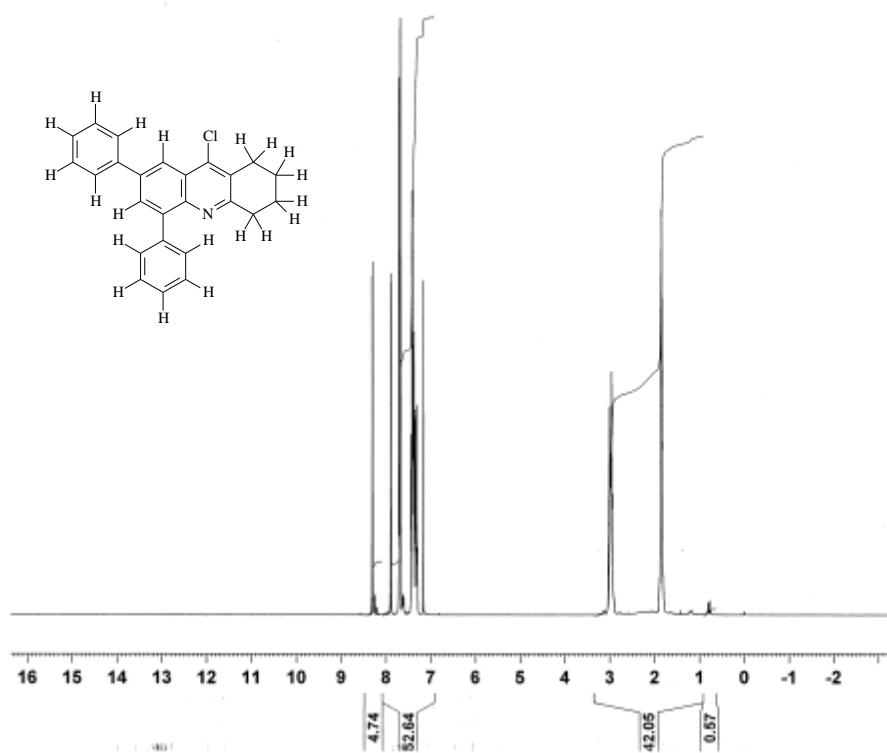

**Figure S3:** <sup>1</sup>H NMR (300 MHz, CDCl<sub>3</sub>) of 2,4-diphenyl-9-chloro-5,6,7,8-tetrahydroacridine (**4a**)

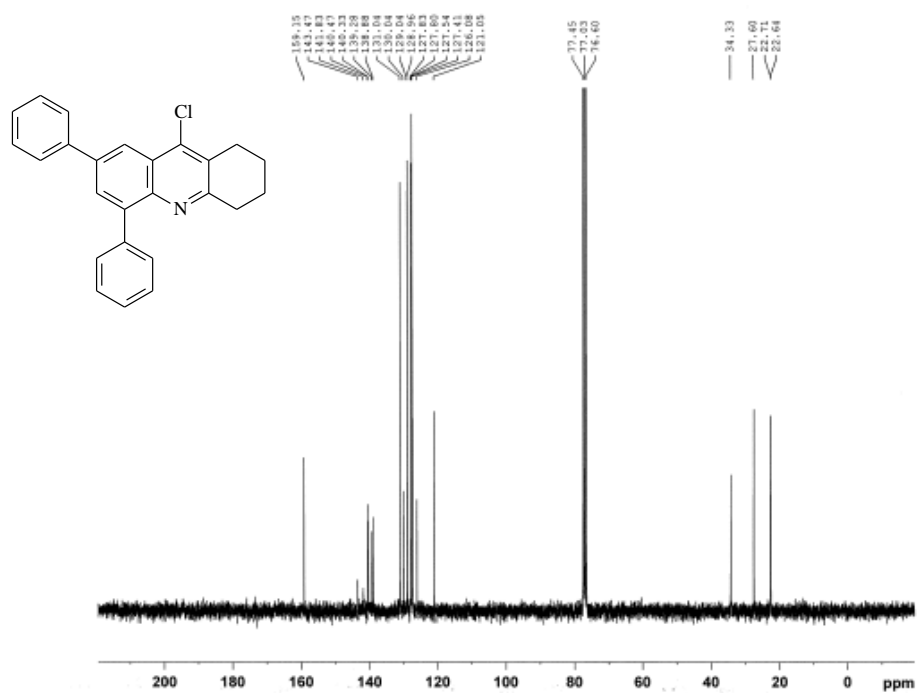

**Figure S4:**  $^{13}\text{C}$  NMR (75 MHz,  $\text{CDCl}_3$ ) of 2,4-diphenyl-9-chloro-5,6,7,8-tetrahydroacridine (**4a**)

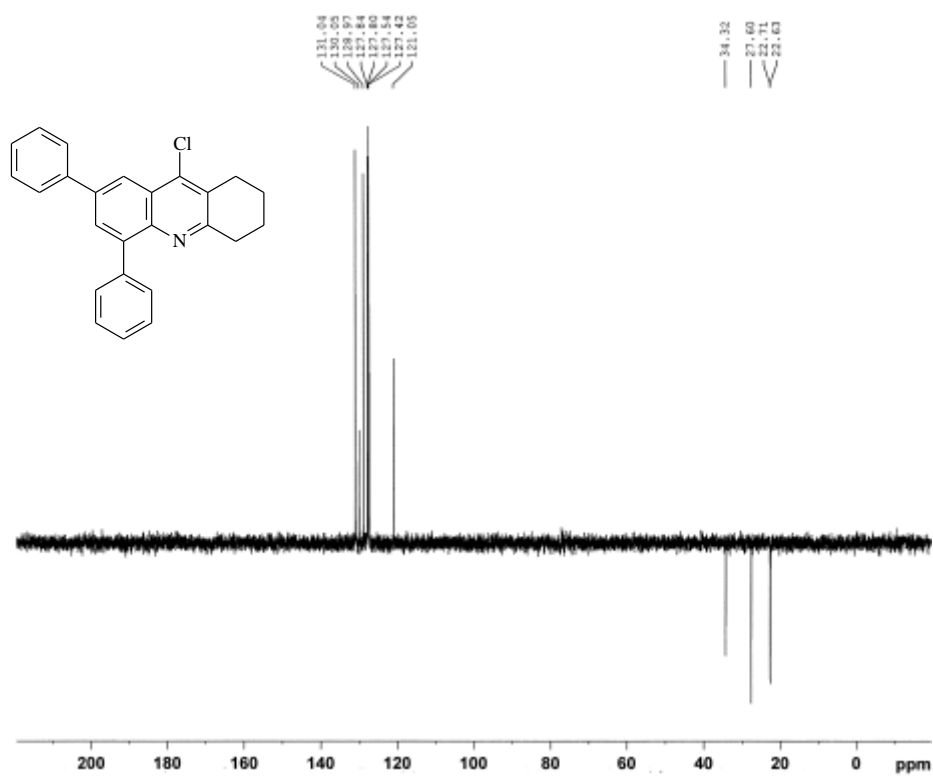

**Figure S5:**  $^{13}\text{C}$  NMR DEPT 135 spectrum of 2,4-diphenyl-9-chloro-5,6,7,8-tetrahydroacridine (**4a**)

MS Zoomed Spectrum

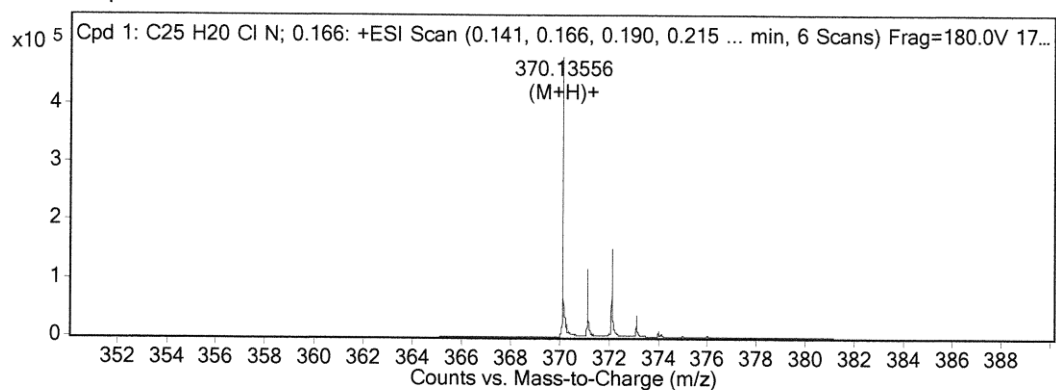

MS Spectrum Peak List

| Ion    | Abund     | Formula   | Calculated Mass | Measured Mass | Difference | Diff (ppm) |
|--------|-----------|-----------|-----------------|---------------|------------|------------|
| (M+H)+ | 485856.59 | C25H20ClN | 370.1357        | 370.13556     | 0.14       | 0.38       |

--- End Of Report ---

Figure S6: MS spectra of 2,4-diphenyl-9-chloro-5,6,7,8-tetrahydroacridine (**4a**)

calculated mass: 369.1357

measured mass: 369.1355

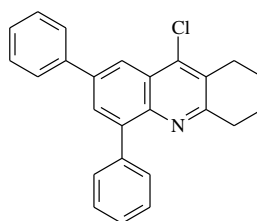

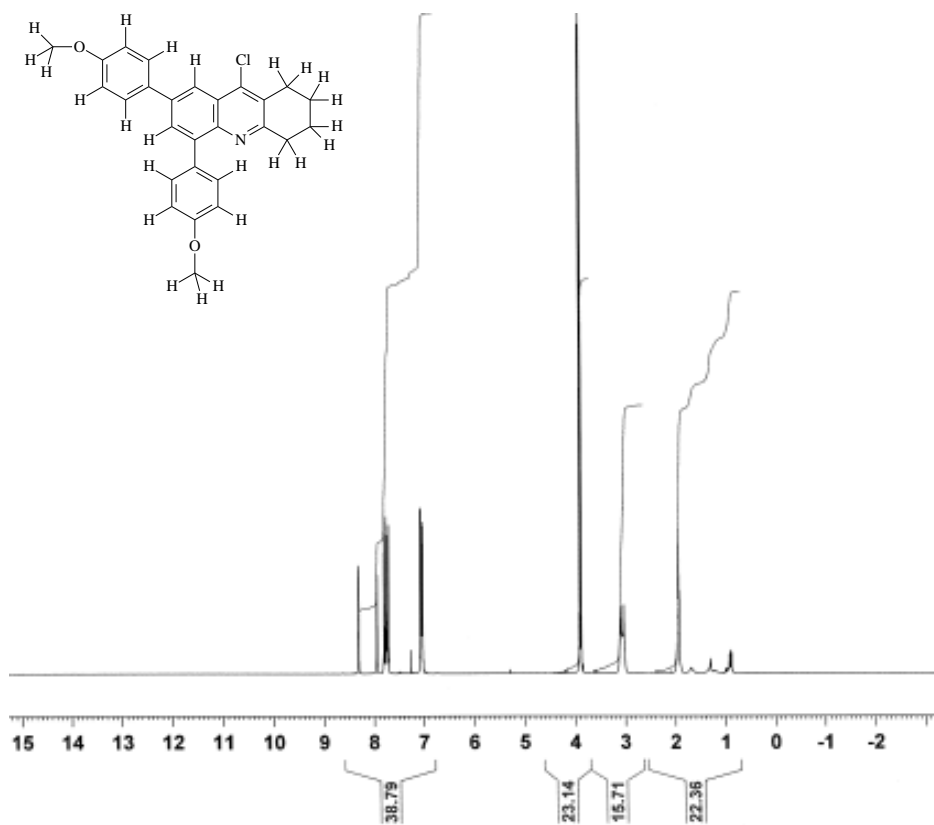

**Figure S7:** <sup>1</sup>H NMR (300 MHz, CDCl<sub>3</sub>) of 2,4-bis(4-methoxyphenyl)-9-chloro-5,6,7,8-tetrahydroacridine (**4b**)



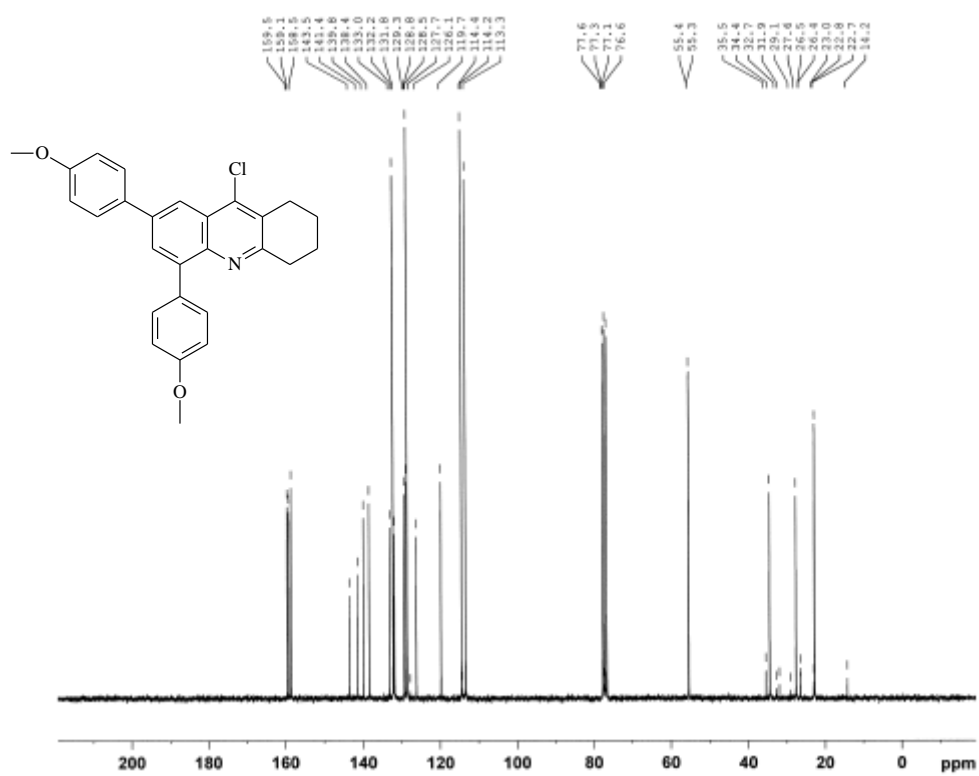

**Figure S8:** <sup>13</sup>C NMR (75 MHz, CDCl<sub>3</sub>) of 2,4-bis(4-methoxyphenyl)-9-chloro-5,6,7,8-tetrahydroacridine (**4b**)

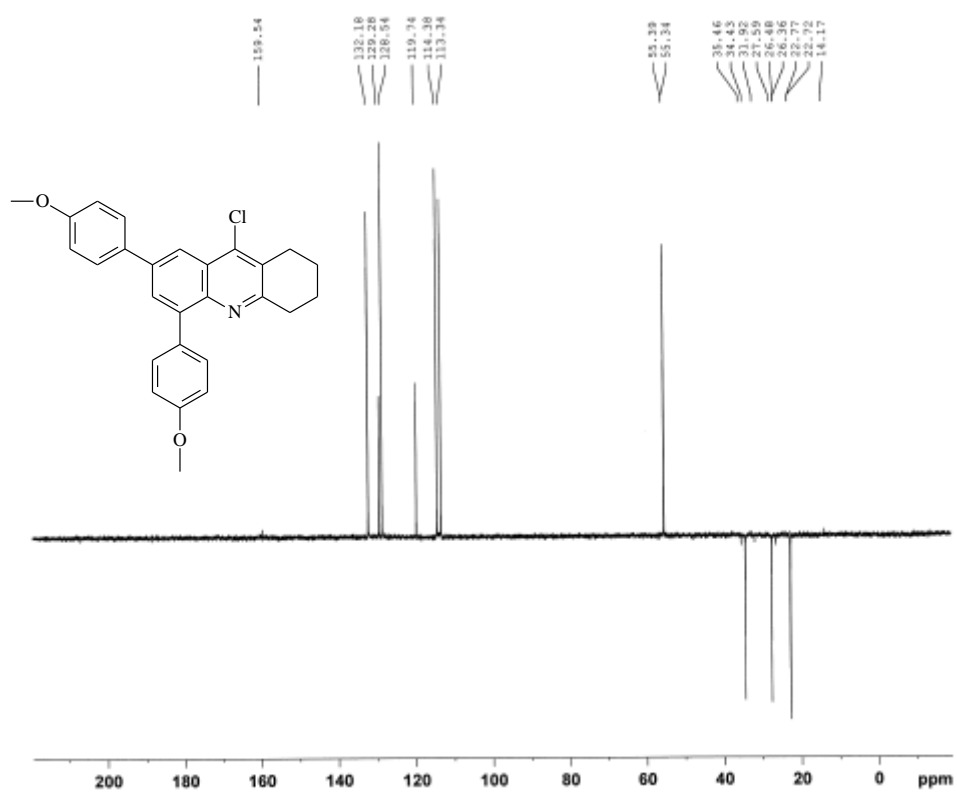

**Figure S9:**  $^{13}\text{C}$  NMR DEPT 135 spectrum of 2,4-bis(4-methoxyphenyl)-9-chloro-5,6,7,8-tetrahydroacridine (**4b**)

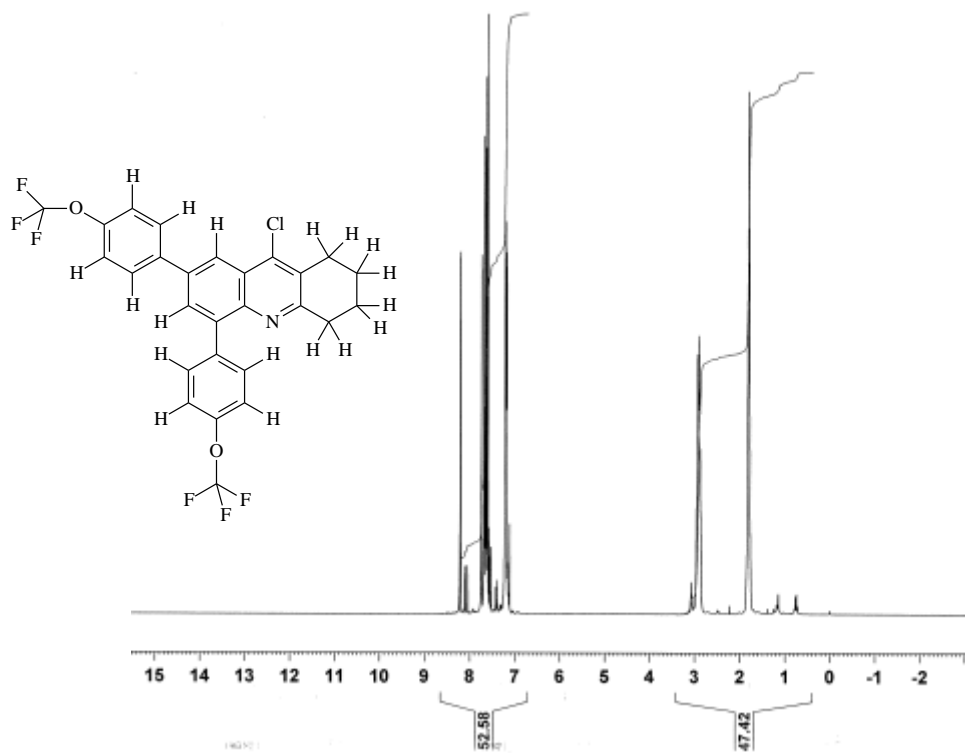

**Figure S10:** <sup>1</sup>H NMR (300 MHz, CDCl<sub>3</sub>) of 2,4-bis(4-trifluoromethoxyphenyl)-9-chloro-5,6,7,8-tetrahydroacridine (**4c**)

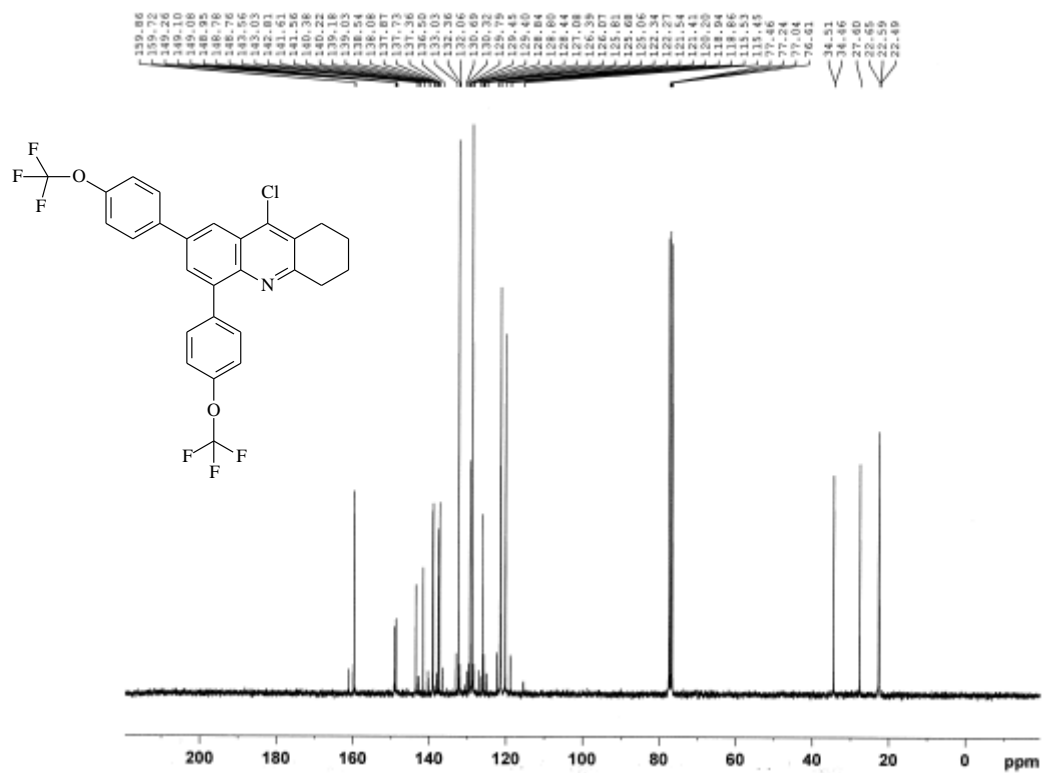

**Figure S11:** <sup>13</sup>C NMR (75 MHz, CDCl<sub>3</sub>) of 2,4-bis(4-trifluoromethoxyphenyl)-9-chloro-5,6,7,8-tetrahydroacridine (**4c**)

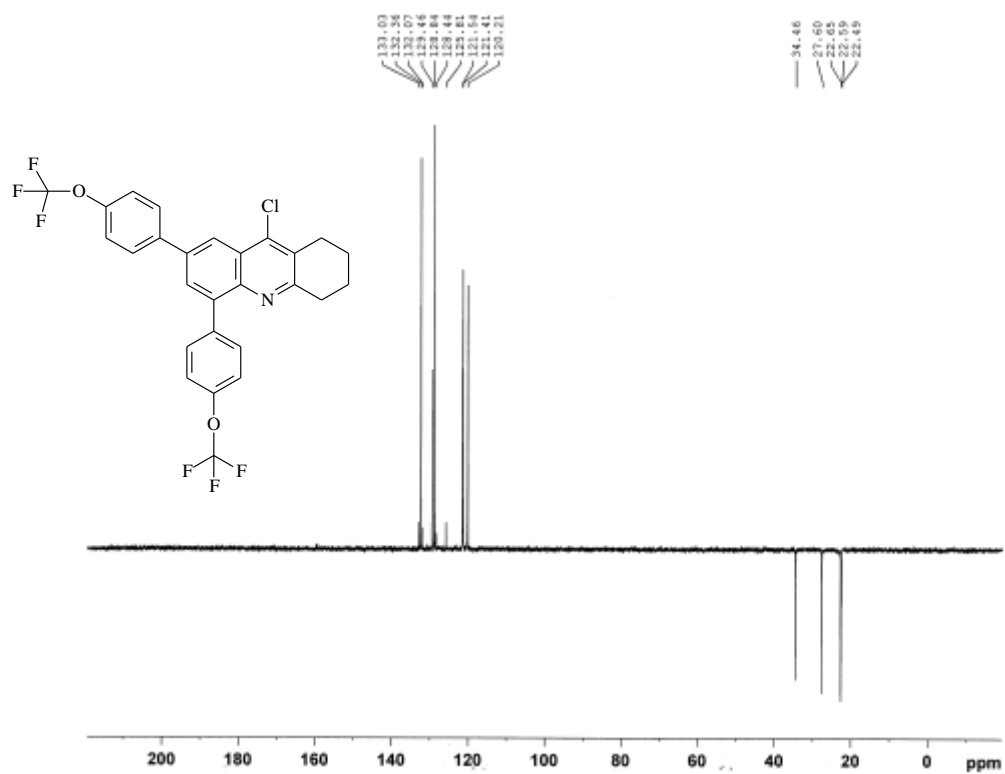

**Figure S12:**  $^{13}\text{C}$  NMR DEPT 135 spectrum of 2,4-bis(4-trifluoromethoxyphenyl)-9-chloro-5,6,7,8-tetrahydroacridine (**4c**)

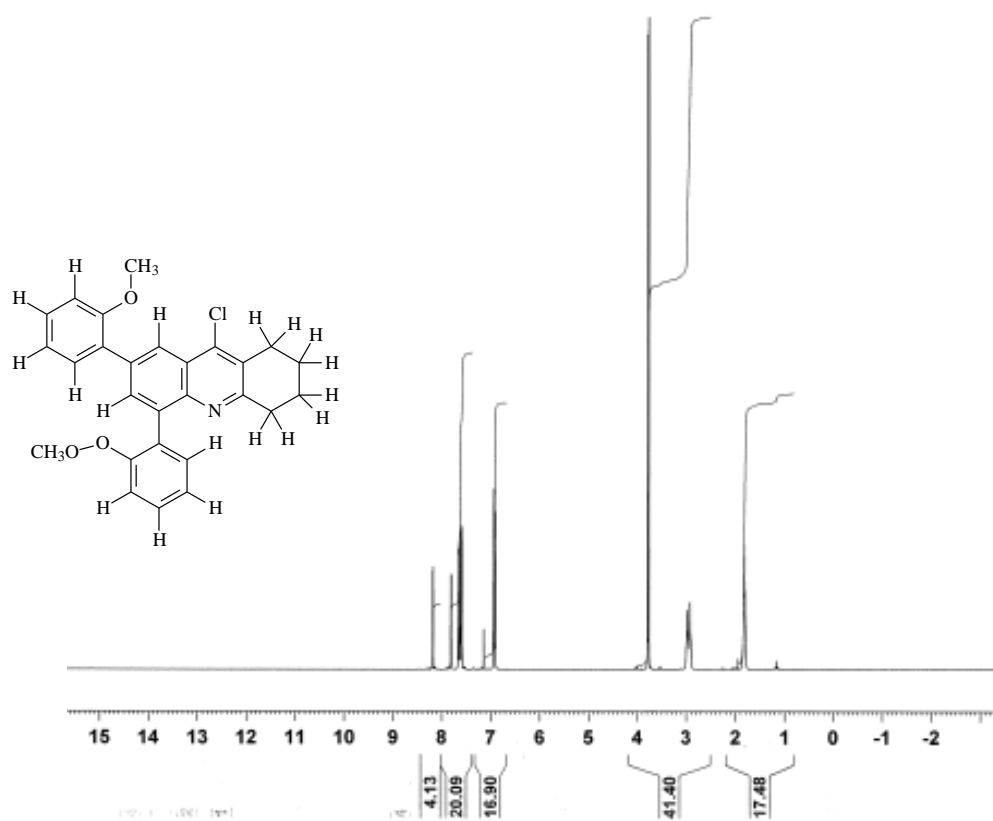

**Figure S13:** <sup>1</sup>H NMR (300 MHz, CDCl<sub>3</sub>) of 2,4-bis(2-methoxyphenyl)-9-chloro-5,6,7,8-tetrahydroacridine (**4d**)

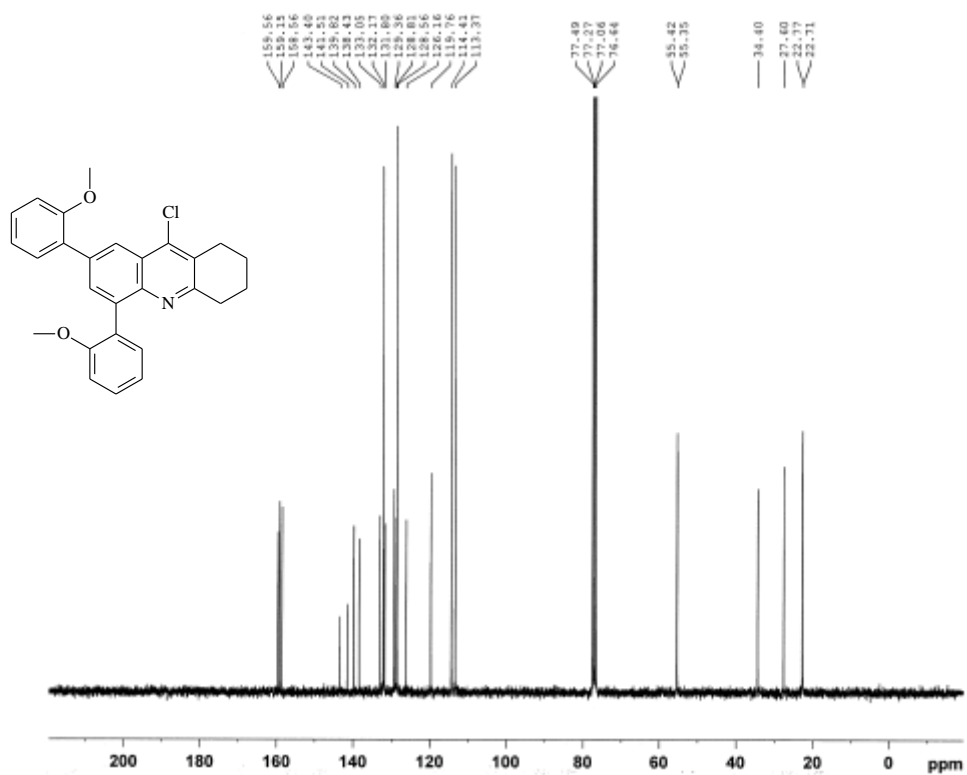

**Figure S14:**  $^{13}\text{C}$  NMR (75 MHz,  $\text{CDCl}_3$ ) of 2,4-bis(2-methoxyphenyl)-9-chloro-5,6,7,8-tetrahydroacridine (**4d**)

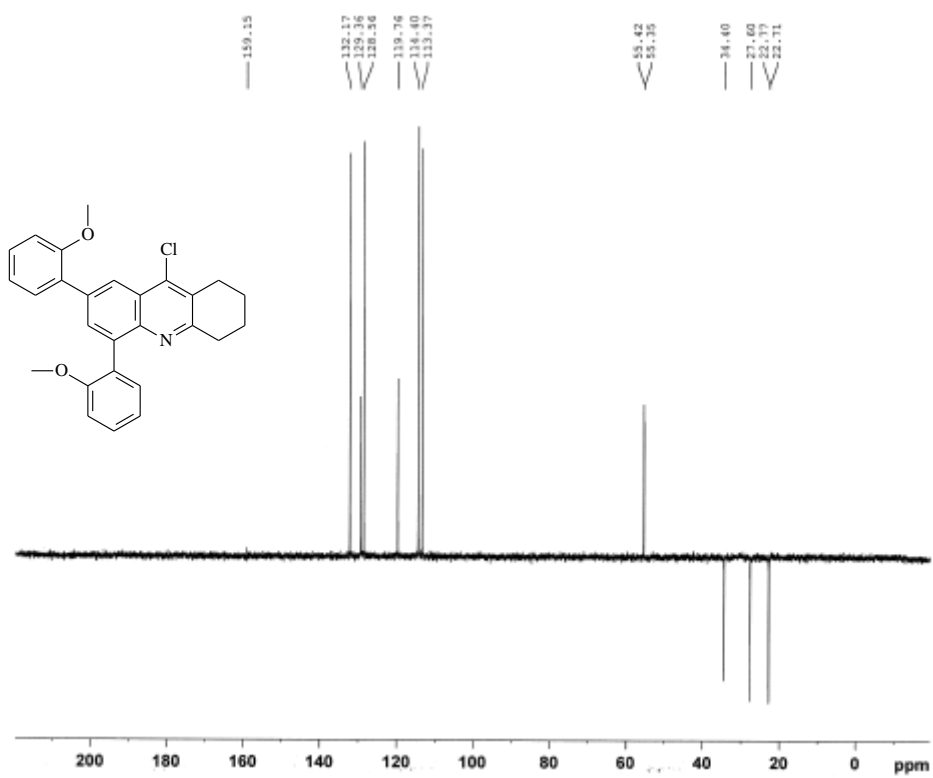

**Figure S15:**  $^{13}\text{C}$  NMR DEPT 135 of 2,4-bis(2-methoxyphenyl)-9-chloro-5,6,7,8-tetrahydroacridine

**(4d)**



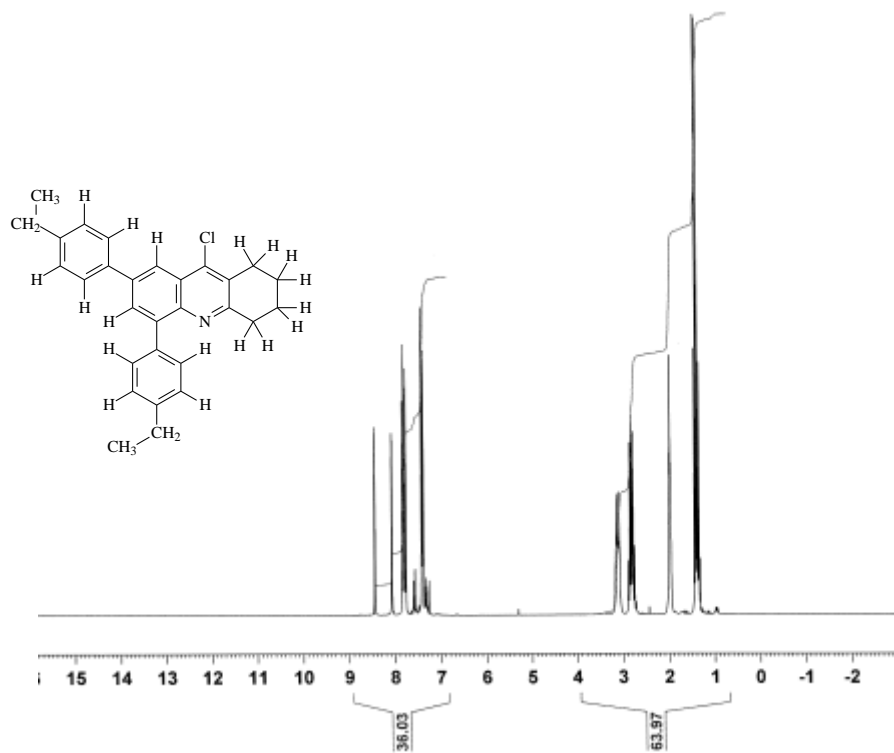

**Figure S16:** <sup>1</sup>H NMR (300 MHz, CDCl<sub>3</sub>) of 2,4-bis(4-ethylphenyl)-9-chloro-5,6,7,8-tetrahydroacridine (**4e**)

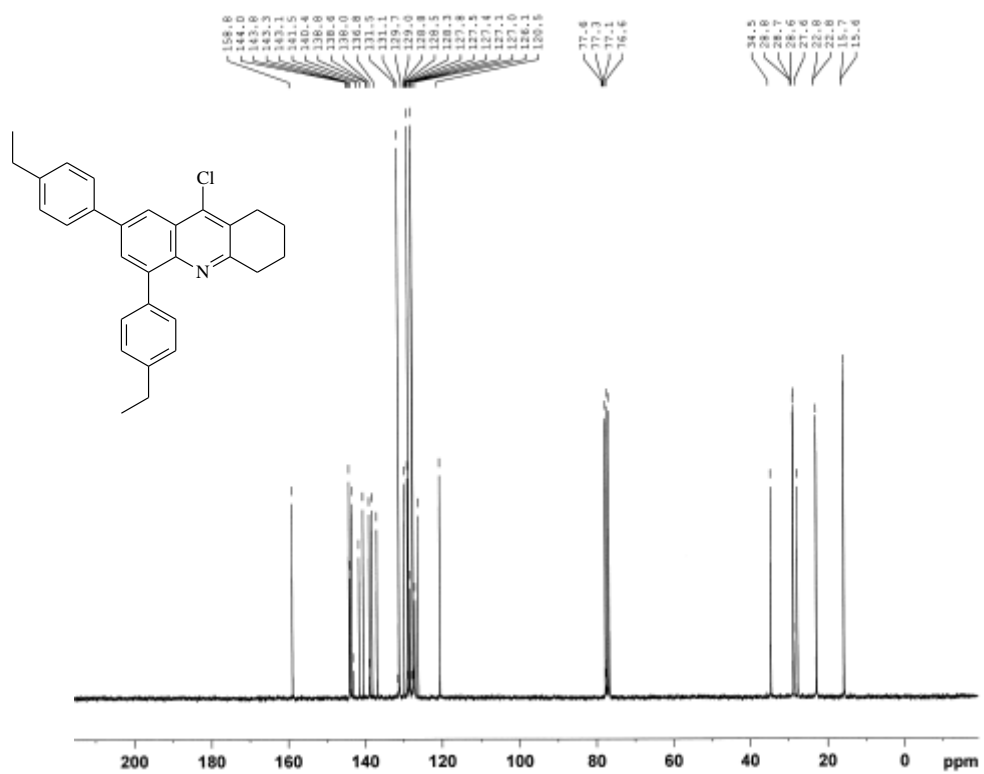

**Figure S17:** <sup>13</sup>C NMR (75 MHz, CDCl<sub>3</sub>) of 2,4-bis(4-ethylphenyl)-9-chloro-5,6,7,8-tetrahydroacridine (4e)

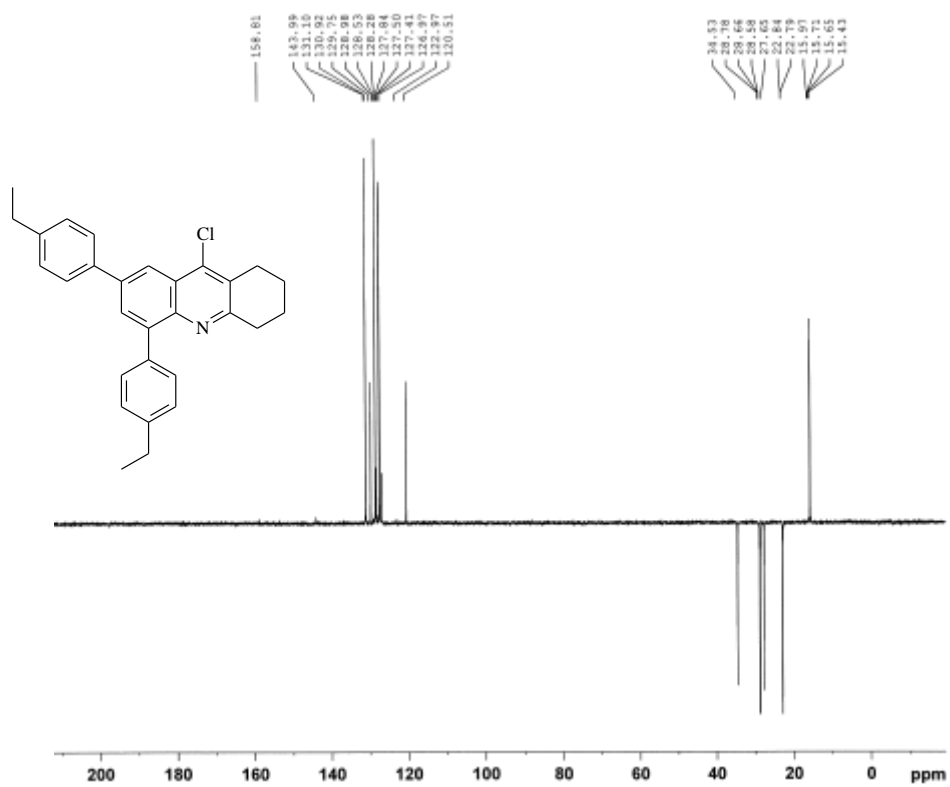

**Figure S18:**  $^{13}\text{C}$  NMR DEPT 135 spectrum of 2,4-bis(4-ethylphenyl)-9-chloro-5,6,7,8-tetrahydroacridine (**4e**)

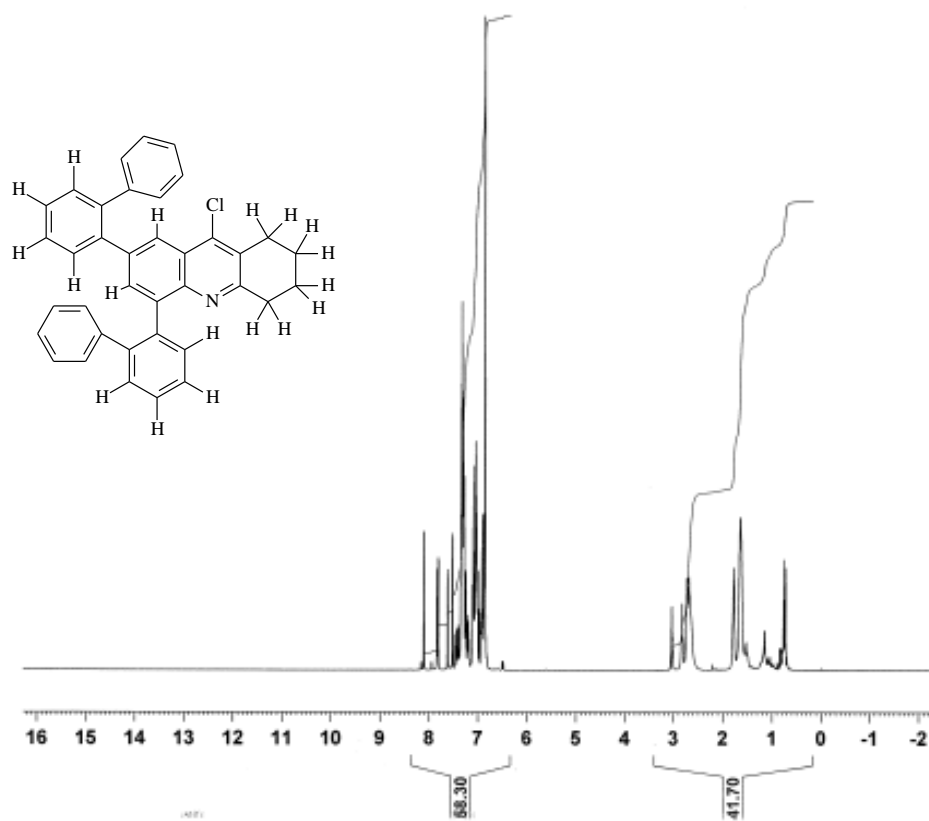

**Figure S19:** <sup>1</sup>H NMR (300 MHz, CDCl<sub>3</sub>) of 2,4-bis(2-phenylphenyl)-9-chloro-5,6,7,8-tetrahydroacridine (**4f**)

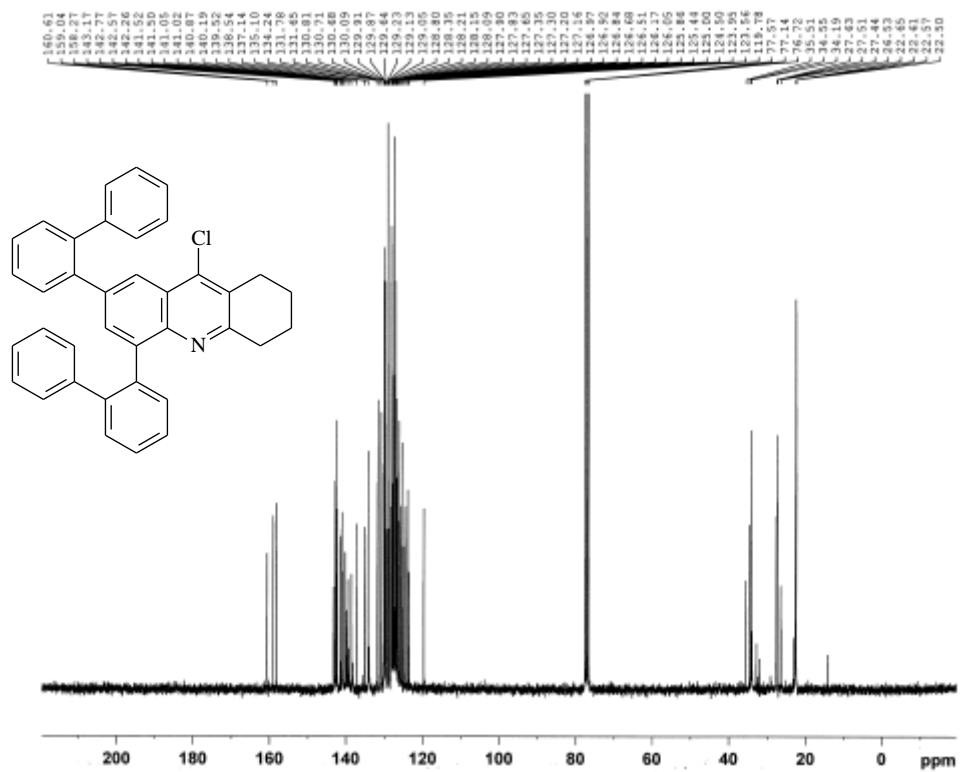

**Figure S20:** <sup>13</sup>C NMR (75 MHz, CDCl<sub>3</sub>) of 2,4-bis(2-phenylphenyl)-9-chloro-5,6,7,8-tetrahydroacridine (**4f**)

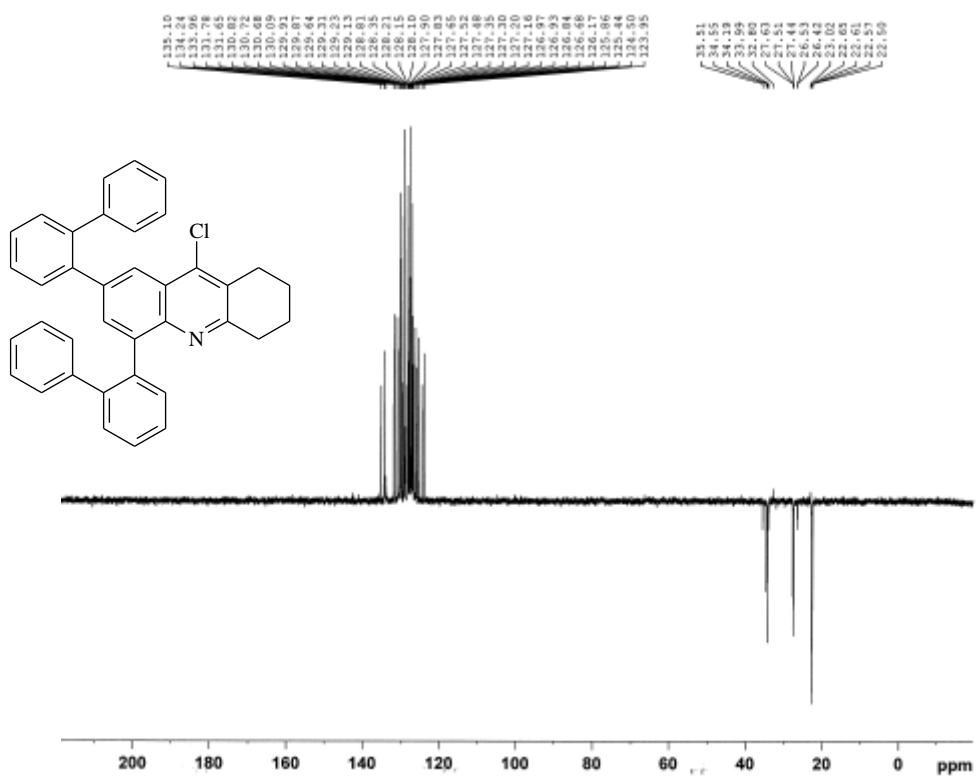

**Figure S21:**  $^{13}\text{C}$  NMR DEPT 135 spectrum of 2,4-bis(2-phenylphenyl)-9-chloro-5,6,7,8-tetrahydroacridine (**4f**)
